# Supplementary material for: Structural Features of Oxyapatite
Source: MDPI journal article supplement (doi:10.3390/min13010102), 2023-01-09
Supplement: s1 [file s1]

# Structural Features of Oxyapatite

Natalia V. Bulina <sup>1,\*</sup>, Leon A. Avakyan <sup>2</sup>, Svetlana V. Makarova <sup>1</sup>, Igor B. Orehov <sup>1</sup>  
and Vladimir S. Bystrov <sup>3</sup>

<sup>1</sup> Institute of Solid State Chemistry and Mechanochemistry, Siberian Branch of the Russian Academy of Sciences, 630128 Novosibirsk, Russia

<sup>2</sup> Physical Faculty, Southern Federal University, 344059 Rostov-on-Don, Russia

<sup>3</sup> Institute of Mathematical Problems of Biology, Keldysh Institute of Applied Mathematics, Russian Academy of Sciences, 142290 Pushchino, Russia

\* Correspondence: bulina@solid.nsc.ru

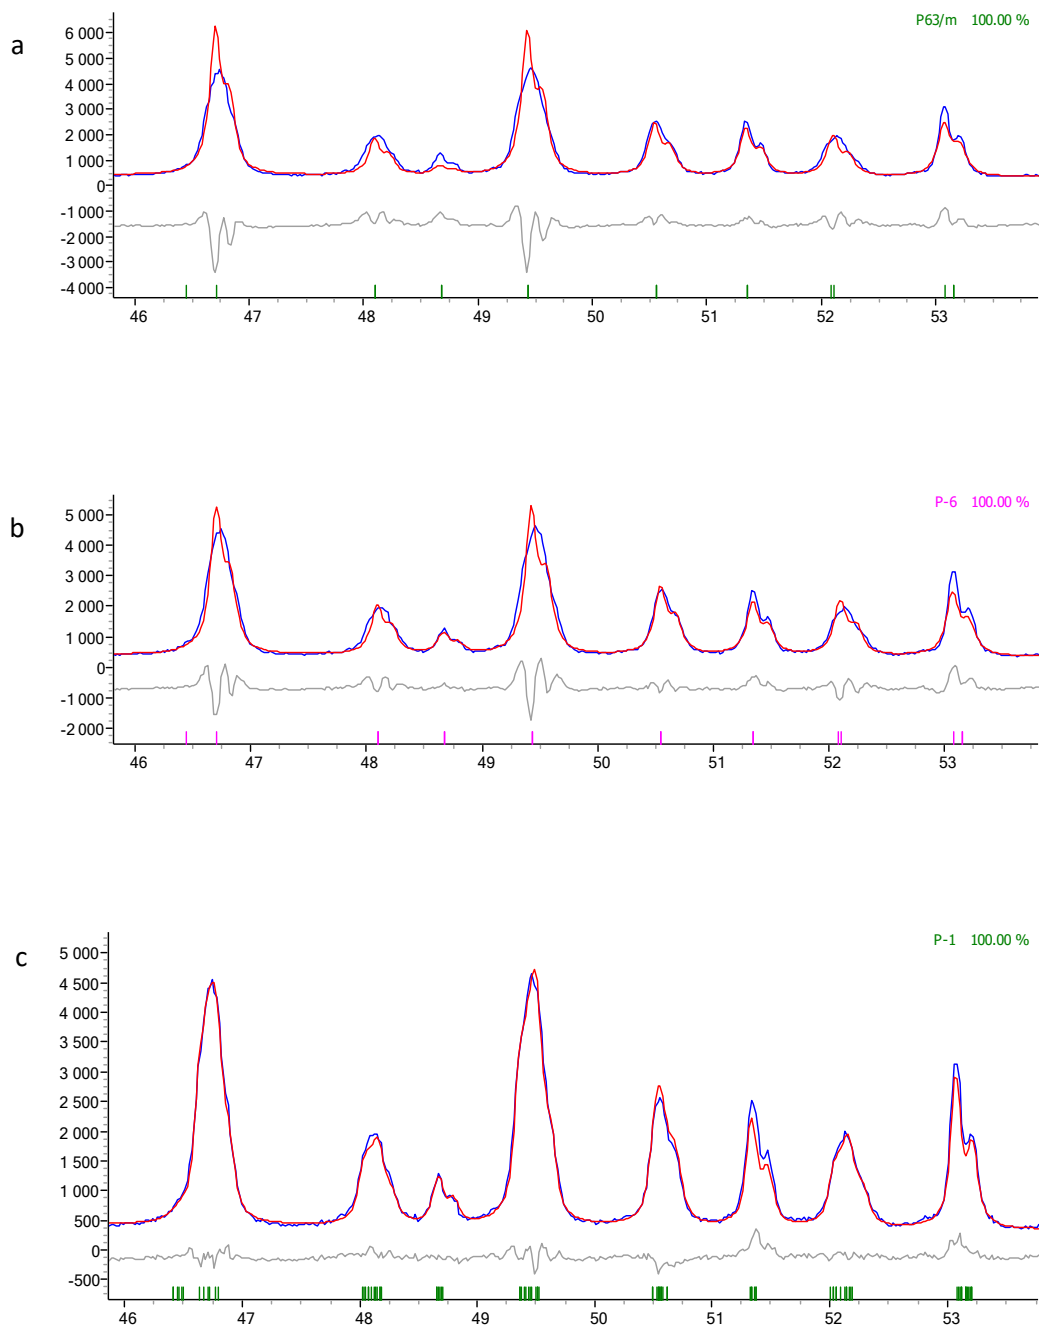

**Figure S1.** Rietveld refinement for sample B in space group  $P6_3/m$  (a),  $P\bar{6}$  (b) and  $P\bar{1}$  (c)

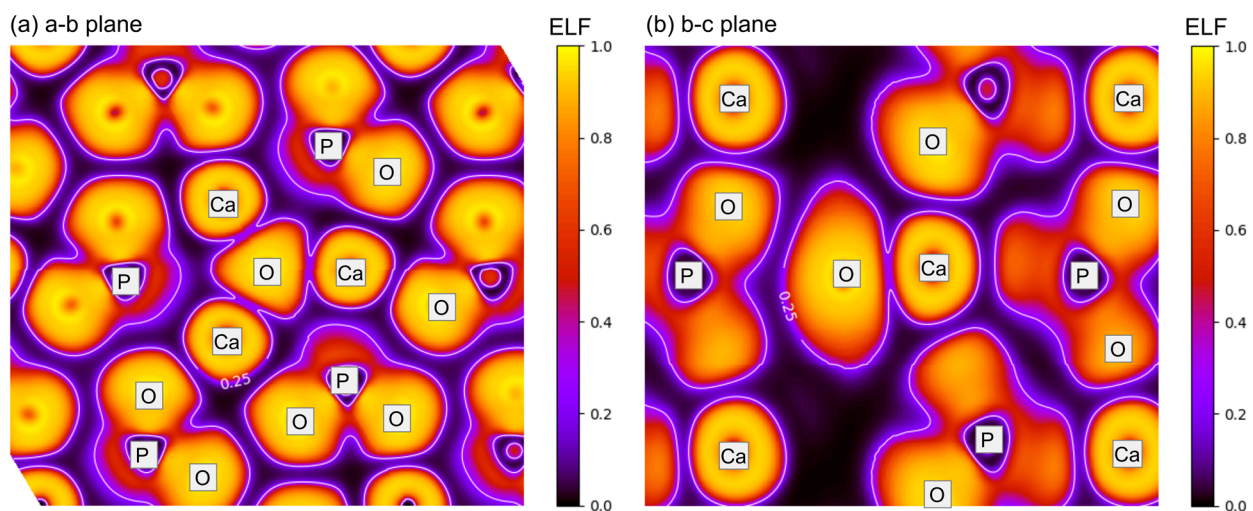

**Figure S2.** Electron localization function (ELF) maps for OA model. (a) a-b plane view, (b) b-c plane view. The view planes are passing through O anion in the hexagonal channel and one of near Ca cation. Other atoms are approximately marked on the figure.

**Table S1.** Results of element analysis obtained by X-ray fluorescent spectroscopy

| Element | Concentration (wt.%) | Concentration (at.%) |
|---------|----------------------|----------------------|
| Al      | 0.34                 | 0.48                 |
| Si      | 0.21                 | 0.27                 |
| P       | 31.30                | 37.00                |
| Cl      | 0.17                 | 0.18                 |
| Ca      | 67.93                | 62.05                |
| Fe      | 0.04                 | 0.03                 |
